# Supplementary material for: Study on Transcriptional Responses and Identification of Ribosomal Protein Genes for Potential Resistance against Brown Planthopper and Gall Midge Pests in Rice
Source: PubMed Central journal article supplement — Curr Genomics. 2021 Feb;22(2):98–110. doi: 10.2174/1389202922666210219113220 (PMC8188583; doi:10.2174/1389202922666210219113220), 2021-02
Supplement: CG-22-98_SD1.pdf [file CG-22-98_SD1.pdf]

## Supplementary Material

### Study on Transcriptional Responses and Identification of Ribosomal Protein Genes for Potential Resistance against Brown Planthopper and Gall Midge Pests in Rice

Mazahar Moin<sup>1,\*,#</sup>, Anusree Saha<sup>2,#</sup>, Achala Bakshi<sup>1</sup>, Divya D<sup>3</sup>, Madhav M.S<sup>1</sup> and Kirti P.B<sup>2,3</sup>

<sup>1</sup>Biotechnology Division, ICAR-Indian Institute of Rice Research (IIRR), Hyderabad-500030, India; <sup>2</sup>Department of Plant Sciences, University of Hyderabad, Hyderabad-500046, India; <sup>3</sup>Agri-Biotech Foundation, PJTS Agricultural University, Hyderabad-500030, India

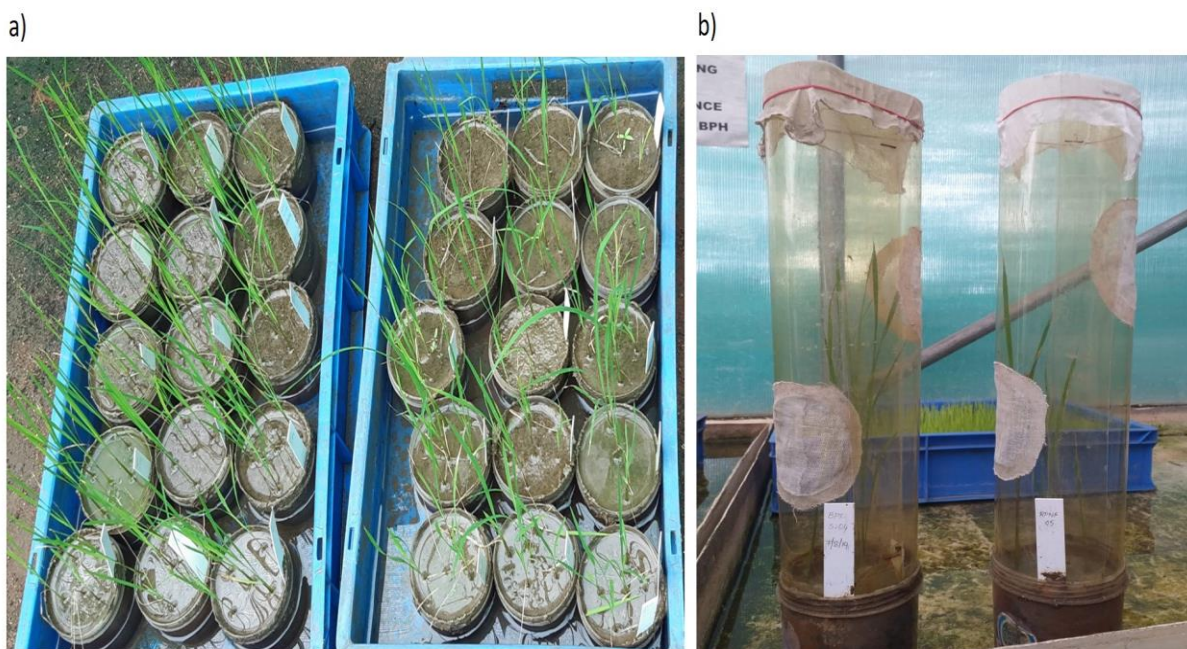

**Supplemental Fig. (1).** Growth of BPT5205 and RPNF05 seedlings and infestation with BPH pest.

- Rice seeds of BPT5204 and RPNF05 were allowed to germinate in plastic trays and plants were raised under controlled greenhouse conditions ( $30 \pm 2^\circ\text{C}$  with 16/8 h of light/ dark photoperiod).
- Infestation of three-week old plants with BPH nymphs.

**Supplementary Table 1. List of primers.****a) Primers used in RPL gene expression studies.**

| <b>Primer Name</b> | <b>Sequence (5'-3')</b> |
|--------------------|-------------------------|
| L3 RT FP           | TGGACTTGTGGCCTATGTGA    |
| L3 RT RP           | CCGGCATCGCTATCATACTT    |
| L4 RT FP           | AAGAAGCTCGACGAGGTGTA    |
| L4 RT RP           | CCACATTCTTCAGAGGGTTC    |
| L5 RT FP           | GATCTTGGCATCAAGTACGAC   |
| L5 RT RP           | GACACCCTCATACTTGACCTG   |
| L6 RT FP           | GTTCCCTAAGCAGCTCAAAT    |
| L6 RT RP           | CTTCTGCTTCTTGTCCCTAGA   |
| L7 RT FP           | TACCCAAACCTGAAGAGTGTC   |
| L7 RT RP           | GACAGTCATGATCTCGTGGA    |
| L8 RT FP           | ACTACGCCATCGTCATCAG     |
| L8 RT RP           | GGTACTTGTGGTAGGCGTTT    |
| L10 RT FP          | AGAAGAAGCCTGGATTAGAGC   |
| L10 RT RP          | ATATCCTGCTGGAGGACTTG    |
| L11 RT FP          | AAGAAGATCGGTGAGGACATC   |
| L11 RT RP          | TCTTGACCTTCTTCCTGTCC    |
| L12 RT FP          | GCTCATTGTACAGCACAGAG    |
| L12 RT RP          | TTGGTTCACTCTGAGAAGGAG   |
| L13a RT FP         | GAACTACCACGACCCATCAG    |
| L13a RT RP         | GGGGCCAAAATATCTATCTG    |
| L13b RT FP         | AAGCACTGGCAGAACTATGTC   |
| L13b RT RP         | CCCTCGACTTCATGTTGTA     |
| L14 RT FP          | GTGAACTACGGCAAGGACTAC   |
| L14 RT RP          | TAACATCAGCCTCCTCCATAG   |
| L15 RT FP          | ACAAGTACGTGTCGGAGCTAT   |
| L15 RT RP          | GACACGGTAAACCACATAACC   |
| L18a RT FP         | TCCAAGTTCTGGTACTTCCTG   |
| L18a RT RP         | GTTGTGGTAACTGTTCTGCT    |
| L18p RT FP         | TGGGGAGGACTACTATGTTGA   |
| L18p RT RP         | AAACCTCTTGTCACTGTGAGG   |
| L19.3 RT FP        | AGTATCGTGAGGCCAAGAAG    |
| L19.3 RT RP        | CTTAGCCTCAAACCTGGTCAGA  |
| L21.2 RT FP        | CTGAGGAAGATCAAGAACGAC   |
| L21.2 RT RP        | AACCACCCTTGAGATCATTG    |
| L22 RT FP          | GAGGTGAAAGGTCTGGATGTT   |
| L22 RT RP          | TCACTGGTTCTTCCTTCTCTG   |
| L23A RT FP         | GACCAAAGACCCTGAAGAAGG   |
| L23A RT RP         | ACGATGAAGACAAGGGTGTG    |
| L24b RT FP         | GTTGGTGCTACACTGGAAGTT   |
| L24b RT RP         | CCTTCGACTGTGTCTTCTGAG   |

|              |                        |
|--------------|------------------------|
| L26.1 RT FP  | ACAAGTACAACGTGGTGAGG   |
| L26.1 RT RP  | GTCCTTGTGCGAGCTTGAGTT  |
| L27.3 RT FP  | CTTCCTCAAGCTCGTCAACT   |
| L27.3 RT RP  | CTTGGTGAAGAACCACCTGT   |
| L28 RT FP    | TAGACGAATACCTCCTGAAGA  |
| L28 RT RP    | AAACCCTGTTTCGATCTTAGTC |
| L29 RT FP    | CCCAACAAGCTCTCCAATATA  |
| L29 RT RP    | AGAAACAGAAGCATTCCCTG   |
| L30e RT FP   | GAGCAAGAAGAAGAACAAGTC  |
| L30e RT RP   | GCTTCATCCATATCTTTTCCG  |
| L31 RT FP    | TCAAGGAGATCAGGAAGTTG   |
| L31 RT RP    | AACAGTGACCAGAGAGTAGAG  |
| L32 RT FP    | GCCTAATATTGGCTATGGTTC  |
| L32 RT RP    | CTTCTTCGTTGAGACATTGTG  |
| L34 RT FP    | GAAGAAGATCCAGGGAATTCC  |
| L34 RT RP    | CACAATCTTCTGCTCTTCAAC  |
| L35a.3 RT FP | CTACGTCTACAAGGCCAAG    |
| L35a.3 RT RP | TGCTGGGGTACATGAAGA     |
| L36.2 RT FP  | GGAAAAGTACCAAGAGAGTGA  |
| L36.2 RT RP  | CTTCTTCTTTGCTCTCTTGTG  |
| L37 RT FP    | CTTCCACCTGCAGAAGAG     |
| L37 RT RP    | CCCCTCTCTGAAGTTACTCT   |
| L38 RT FP    | CACGAGATCAAGGACTTCC    |
| L38 RT RP    | AAAGGTGGATGAAATGTAGGC  |
| L44 RT FP    | AAGAAGACCTACTGCAAGAAC  |
| L44 RT RP    | CCTTACCCTTCTTGTACTGAG  |
| L51 RT FP    | GTGACAGAGTTAGTCCGTGGA  |
| L51 RT RP    | TCTCAGCTTACCACCTTTTCT  |

\*RT-Real-time, FP-Forward primer, RP-reverse primer

**b) Primers used in RPS gene expression studies.**

| Gene name | Forward primer (5'-3') | Reverse primer (5'-3') |
|-----------|------------------------|------------------------|
| S3a       | TGAAGCCCATGTGGATGTTA   | TCACATGTTGATGCCTGGTT   |
| S4        | CAGGTTGAAGTATGCGCTGA   | AGCGACCCTTGGTGTGCATAG  |
| S4a       | AGCGGCATGTTATGGTTGAT   | GGACCTTGAGAGCTTGAAC    |
| S5        | ATATCCCTCGCCGACTACCT   | TGATCTTCTTGCCGTTGTTG   |
| S5a       | CAACGGGAAGAAGATCATGG   | GACCCTCCTCAAGGGAGAGA   |
| S6        | GCTACGGCATCAAGAAGCTC   | CAAGTGCCGTGTACAAAGT    |
| S6a       | CATGAAGCAGGGTGTGCTTA   | TCAGTCAAGCCAGGAAGGTC   |
| S7        | TGTGCAAGGCATTCAAGAAA   | TCCAAGATTCCATCATGAACAG |
| S7a       | AGAAGAAGTTCAGCGGCAAG   | GCACCATCCAGACGGTATCT   |
| S9        | TTATCAGGCAGCACCATC     | GGCCTTCTGGTTCTTCTCT    |
| S9-2      | GAGCTGTGGCGTGTTCAGTA   | AACAGTGAGGGCAAGGACAT   |
| S10       | CCCTCAAGAAGTCTGCCAAG   | ACCAAATCACCTGGAGCAC    |

|      |                       |                        |
|------|-----------------------|------------------------|
| S10a | GCATTGAGCACCTGAGGAAT  | AACCTTGGTCTGTCCCCTTC   |
| S13  | AGGTGGAGGAGATGATCGTG  | GACGGCCTTCTTGATGAGG    |
| S13a | GTGGTGCTCCGTGACCAG    | TGGAGTCCTTGTCTTCTCTG   |
| S15  | ATGACCTCGTCCAGCTCTTC  | CCGATCATCTCAGGGACAAT   |
| S15a | CCGACCCTCATCAAAGGTTA  | TCCTTGACACCAACATCGAA   |
| S17  | ACAAGAAGGTGCTGGAGGA   | TCCTGGAGCTTGAGGGAGAT   |
| S18  | CGACATCGACATGAACAAGC  | TCAGCCTCTCAAGGTCATCC   |
| S18a | CTCACCTCCATCAAGGGTGT  | ACCTCCCGTCTTGTAGTCC    |
| S18b | AAGGATGGGAGGTTCTCTCAG | TCTTGAGACACCGACAGTCT   |
| S19  | CAAGATGGAGCTCCCTGAGT  | GGACGTGAGCCATTCTCT     |
| S21  | TCAGATGGTGGACCTCTACG  | AGAGCACTGTCCGGCTCT     |
| S23  | GAGCCATCTTGCCAATGAAT  | CGATGAAGTTCAAGCAACCA   |
| S23a | TTTTGGGAGAAAAAGGCTTG  | CCTCTGCTTCTTCTTCTCCTTG |
| S24  | GTCTCCAAGGCTGAGCTGAA  | CTTGGGCTCGTACTTCTTCG   |
| S25  | GGGAAAGCAAAAGGAGAAGG  | GATTAGGCCCGTGTGCTATTA  |
| S25a | CGGAGGCAAGCAGAAGAAG   | CAAGATCCTTGATGGCCTGT   |
| S26  | CAAGGCGATCAAGAGGTTTC  | GACGATGTGAGCATGGATTG   |
| S27  | CGGAGCTGGAGAAGCTCA    | CTGGCCTCCACCAGTAG      |
| S27a | CGAAGATCCAGGACAAGGAG  | CTTGGGCTTGGTGTACGTCT   |
| S28  | GGATACCCAGGTCAAACCTGC | CTGGCCTCCCTCTCAGACT    |
| S29  | CACTCCAACGTGTGGAACCTC | CGGTACTTGATGAAGCCAATG  |
| S30  | GAAGGTGAGGGGCGAGAC    | GACGAAACGGCGTTGTACT    |

\*RT, real-time; FP, forward primer; RP, reverse primer

**Supplementary Table 2. List of wound-responsive cis-elements present in the putative promoter regions of RP genes.**

| <i>Cis-elements</i>               | <i>RPL genes</i>                                                                                                          | <i>RPS genes</i>                                                                                                                             |
|-----------------------------------|---------------------------------------------------------------------------------------------------------------------------|----------------------------------------------------------------------------------------------------------------------------------------------|
| W-Box (wound induced signaling)   | <i>RPL3, L4, L6, L8, L11, L18P, L23A, L30e, L34</i>                                                                       | <i>RPS7, S9, S23, S25.</i>                                                                                                                   |
| WUN- motif (wound-induced stress) | <i>RPL23a</i>                                                                                                             | <i>RPS10a, S24.</i>                                                                                                                          |
| TCA element (SA responsive)       | <i>RPL3, L4, L10, L18a, L18P, L24a, L30e, L31, L32, L34, L35</i>                                                          | <i>RPS4, S4a, S7a, S9, S13, S13a, S17, S18, S23a, S24, S25a, S26, S27, S27a, S28</i>                                                         |
| ERE (ethylene responsive element) | <i>RPL27.3, L26.1</i>                                                                                                     | <i>RPS9, S13a, S27, S28</i>                                                                                                                  |
| TGACG motif (MeJA responsive)     | <i>RPL6, L8, L10, L11, L13b, L14, L18a, L18P, L19.3, L21.2, L23a, L24, L26.1, L28, L31, L32, L34, L35, L36, L38, L44.</i> | <i>RPS3a, S4, S4a, S5, S6, S6a, S7, S9.2, S10, S10a, S13, S15, S15a, S18, S18a, S19, S23, S23a, S24, S25, S25a, S26, S27, S27a, S29, S30</i> |
| CGTCA motif (MeJA responsive)     | <i>RPL10, L11, L14, L15, L18a, L21.2, L23a, L26.1, L30e, L31, L32, L36, L38, L44</i>                                      | <i>RPS3a, S4, S4a, S5, S6, S6a, S7, S9.2, S10, S10a, S13, S15, S15a, S18, S18a, S19, S23, S23a, S24, S25, S25a, S26, S27, S27a, S29</i>      |

**Supplementary Table 3. List of commonly up and downregulated RPL and RPS genes.**

| Treatment                                | Total genes up-regulated | List of overlapping genes or commonly upregulated genes                      |
|------------------------------------------|--------------------------|------------------------------------------------------------------------------|
| BPT-BPH-12 h, BPT-BPH-6 h, RPNF-BPH-12 h | 3                        | L26.1 L7 L22                                                                 |
| BPT-BPH-6 h, RPNF-BPH-12 h, RPNF-BPH-6 h | 1                        | L15                                                                          |
| BPT-BPH-12 h, BPT-BPH-6 h                | 7                        | L13a L4 L21.2 L8 L10 L12 L13b                                                |
| BPT-BPH-12 h, RPNF-BPH-6 h               | 1                        | L51                                                                          |
| BPT-BPH-12 h, RPNF-BPH-12 h              | 2                        | L11 L38                                                                      |
| BPT-BPH-12 h                             | 17                       | L44 L28 L19.3 L5 L27.3 L31 L29 L34 L18p L36.2 L35a.3 L6 L18a L32 L30e L3 L37 |

**Supple Table. 3b. List of RPL genes commonly up-regulated in response to GM in BPT and RPNF genotypes.**

| Treatment                                | Total Genes Up-regulated | List of Overlapping Genes |
|------------------------------------------|--------------------------|---------------------------|
| BPT-GM-24 h, RPNF-GM-120 h, RPNF-GM-24 h | 1                        | L15                       |
| BPT-GM-120 h, BPT-GM-24 h                | 1                        | L30e                      |
| BPT-GM-24 h, RPNF-GM-120 h               | 1                        | L22                       |
| BPT-GM-24 h                              | 5                        | L27.3 L6 L13b L4 L21.2    |
| BPT-GM-120 h                             | 4                        | L5 L31 L29 L34            |
| RPNF-GM-24 h                             | 1                        | L18a                      |
| RPNF-GM-120 h                            | 2                        | L38 L36.2                 |

**Supple Table. 3c. List of RPL genes commonly down-regulated in response to BPH in BPT and RPNF.**

| Treatment                                              | Total Genes Down-regulated | List of Overlapping Genes                                                    |
|--------------------------------------------------------|----------------------------|------------------------------------------------------------------------------|
| BPT-BPH-12 h, BPT-BPH-6 h, RPNF-BPH-12 h, RPNF-BPH-6 h | 4                          | L23A L24a L14 L24b                                                           |
| BPT-BPH-6 h, RPNF-BPH-12 h, RPNF-BPH-6 h,              | 17                         | L44 L27.3 L31 L29 L5 L19.3 L28 L34 L18p L36.2 L35a.3 L6 L18a L32 L30e L3 L37 |
| BPT-BPH-6 h, RPNF-BPH-6 h                              | 2                          | L11 L38                                                                      |
| BPT-BPH-6 h, RPNF-BPH-12 h                             | 1                          | L51                                                                          |
| RPNF-BPH-12 h, RPNF-BPH-6 h                            | 7                          | L13a L13b L4 L21.2 L8 L10 L12                                                |
| BPT-BPH-12 h                                           | 1                          | L15                                                                          |
| RPNF-BPH-6 h                                           | 3                          | L22 L26.1 L7                                                                 |

**Supple Table. 3d. List of RPL genes commonly down-regulated in response to GM in BPT and RPNF.**

| Treatment                                              | Total Genes Down-regulated | List of Overlapping Genes                                                                    |
|--------------------------------------------------------|----------------------------|----------------------------------------------------------------------------------------------|
| BPT-GM-120 h, BPT-GM-24 h, RPNF-GM-120 h, RPNF-GM-24 h | 21                         | L44 L11 L23A L13a L24a L14 L19.3 L28 L38 L8 L18p L24b L26.1 L35a.3 L51 L10 L12 L7 L32 L3 L37 |
| BPT-GM-120 h, BPT-GM-24 h, RPNF-GM-24 h                | 1                          | L36.2                                                                                        |
| BPT-GM-120 h, BPT-GM-24 h, RPNF-GM-120 h               | 1                          | L18a                                                                                         |
| BPT-GM-24 h, RPNF-GM-120 h, RPNF-GM-24 h               | 4                          | L31 L29 L5 L34                                                                               |
| BPT-GM-120 h, RPNF-GM-120 h, RPNF-GM-24 h              | 5                          | L27.3 L13b L4 L21.2 L6                                                                       |
| BPT-GM-120 h, RPNF-GM-24 h                             | 1                          | L22                                                                                          |
| RPNF-GM-120 h, RPNF-GM-24 h                            | 1                          | L30e                                                                                         |
| BPT-GM-120 h                                           | 1                          | L15                                                                                          |

**Supple Table. 3e. List of RPS genes commonly up-regulated in response to BPH in BPT and RPNF.**

| Treatment                                              | Total Genes Up-regulated | List of Overlapping Genes                   |
|--------------------------------------------------------|--------------------------|---------------------------------------------|
| BPT-BPH-12 h, BPT-BPH-6 h, RPNF-BPH-12 h, RPNF-BPH-6 h | 1                        | S23a                                        |
| BPT-BPH-12 h, BPT-BPH-6 h, RPNF-BPH-12 h               | 3                        | S13 S5 S25a                                 |
| BPT-BPH-12 h, BPT-BPH-6 h                              | 7                        | S25 S13a S18 S27a S24 S4a S21               |
| BPT-BPH-12 h, RPNF-BPH-12 h                            | 1                        | S6                                          |
| BPT-BPH-12 h                                           | 10                       | S18b S10a S28 S10 S6a S26 S18a S9-2 S17 S19 |
| RPNF-BPH-12 h                                          | 1                        | S5a                                         |

**Supple Table. 3f. List of RPS genes commonly up-regulated in response to GM in BPT and RPNF.**

| Treatment                                | Total genes up-regulated | List of overlapping genes                          |
|------------------------------------------|--------------------------|----------------------------------------------------|
| BPT-GM-24 h, RPNF-GM-120 h, RPNF-GM-24 h | 1                        | S25a                                               |
| BPT-GM-120 h, BPT-GM-24 h                | 2                        | S10a S15                                           |
| BPT-GM-24 h, RPNF-GM-120 h               | 1                        | S5                                                 |
| BPT-GM-24 h                              | 13                       | S13 S9 S25 S6a S26 S7a S13a S23a S6 S4 S24 S4a S21 |
| BPT-GM-120 h                             | 1                        | S7                                                 |
| RPNF-GM-120 h                            | 1                        | S9-2                                               |

**Supple Table. 3g. List of RPS genes commonly down-regulated in response to BPH in BPT and RPNF.**

| Treatment                                              | Total genes down-regulated | List of overlapping genes                     |
|--------------------------------------------------------|----------------------------|-----------------------------------------------|
| BPT-BPH-12 h, BPT-BPH-6 h, RPNF-BPH-12 h, RPNF-BPH-6 h | 12                         | S15a S30 S20 S29 S23 S3a S27 S9 S7a S4 S15 S7 |
| BPT-BPH-12 h, BPT-BPH-6 h, RPNF-BPH-6 h                | 1                          | S5a                                           |
| BPT-BPH-6 h, RPNF-BPH-12 h, RPNF-BPH-6 h               | 9                          | S26 S9-2 S19 S10a S28 S10 S6a S18a S17        |
| BPT-BPH-6 h, RPNF-BPH-6 h                              | 1                          | S6                                            |
| RPNF-BPH-12 h, RPNF-BPH-6 h                            | 8                          | S13a S27a S24 S4a S18b S25 S18 S21            |
| RPNF-BPH-6 h                                           | 3                          | S13 S25a S5                                   |

**Supple Table. 3h. List of RPS genes commonly down-regulated in response to GM in BPT and RPNF.**

| Treatment                                              | Total genes down-regulated | List of overlapping genes                                 |
|--------------------------------------------------------|----------------------------|-----------------------------------------------------------|
| BPT-GM-120 h, BPT-GM-24 h, RPNF-GM-120 h, RPNF-GM-24 h | 14                         | S15a S30 S13 S20 S29 S23 S27a S3a S27 S28 S10 S5a S17 S15 |
| BPT-GM-120 h, BPT-GM-24 h, RPNF-GM-24 h                | 1                          | S9-2                                                      |
| BPT-GM-24 h, RPNF-GM-120 h, RPNF-GM-24 h               | 1                          | S7                                                        |
| BPT-GM-120 h, RPNF-GM-120 h, RPNF-GM-24 h              | 12                         | S26 S13a S23a S24 S4a S9 S25 S6a S7a S6 S4 S21            |
| BPT-GM-120 h, RPNF-GM-24 h                             | 1                          | S5                                                        |
| RPNF-GM-120 h, RPNF-GM-24 h                            | 5                          | S19 S18b S10a S18 S18a                                    |

|              |   |      |
|--------------|---|------|
| BPT-GM-120 h | 1 | S25a |
|--------------|---|------|

**Supplementary Table 4. Adjustment of P values of RPL genes calculated through two-way ANOVA by Bonferroni correction.**

| Treatment   | Gene   | p-value     | alpha altered | alpha critical  | Significance    |
|-------------|--------|-------------|---------------|-----------------|-----------------|
| BPT-BPH-6 h | L3     | 0.056       | 0.0001        | 0.054463512     | Non significant |
|             | L4     | 0.043       | 7.67857E-05   | 0.042090191     | significant     |
|             | L5     | 0.055       | 9.82143E-05   | 0.053517409     | Non significant |
|             | L6     | 0.052       | 9.28571E-05   | 0.050673425     | Non significant |
|             | L7     | 0.043       | 7.67857E-05   | 0.042090191     | significant     |
|             | L8     | 0.0536      | 9.57143E-05   | 0.052191276     | Non significant |
|             | L10    | 0.041       | 7.32143E-05   | 0.040172311     | significant     |
|             | L11    | 0.0234      | 4.17857E-05   | 0.023128821     | significant     |
|             | L12    | 0.0159      | 2.83929E-05   | 0.015774484     | significant     |
|             | L13a   | 0.054       | 9.64286E-05   | 0.05257036      | Non significant |
|             | L13b   | 0.062       | 0.000110714   | 0.060120339     | Non significant |
|             | L14    | 0.0334      | 5.96429E-05   | 0.032849342     | significant     |
|             | L15    | 0.045       | 8.03571E-05   | 0.044004247     | significant     |
|             | L18a   | 0.041       | 7.32143E-05   | 0.040172311     | significant     |
|             | L18p   | 0.038       | 6.78571E-05   | 0.0372883       | significant     |
|             | L19.3  | 0.045       | 8.03571E-05   | 0.044004247     | significant     |
|             | L21.2  | 0.0458      | 8.17857E-05   | 0.044768799     | significant     |
|             | L22    | 0.0446      | 7.96429E-05   | 0.043621741     | significant     |
|             | L23A   | 0.0547      | 9.76786E-05   | 0.053233393     | Non significant |
|             | L24a   | 0.0518      | 0.0000925     | 0.050483523     | Non significant |
|             | L24b   | 0.0517      | 9.23214E-05   | 0.050388558     | Non significant |
|             | L26.1  | 0.0581      | 0.00010375    | 0.056447257     | Non significant |
|             | L27.3  | 0.432       | 0.000771429   | 0.350898847     | significant     |
|             | L28    | 0.0514      | 9.17857E-05   | 0.050103606     | Non significant |
|             | L29    | 0.0521      | 9.30357E-05   | 0.050768362     | Non significant |
|             | L30e   | 0.0498      | 8.89286E-05   | 0.048582417     | significant     |
|             | L31    | 0.0485      | 8.66071E-05   | 0.047344662     | significant     |
|             | L32    | 0.0487      | 8.69643E-05   | 0.04753519      | significant     |
|             | L34    | 0.0413      | 0.00007375    | 0.040460237     | significant     |
|             | L35a.3 | 0.0475      | 8.48214E-05   | 0.046391448     | significant     |
|             | L36.2  | 0.0487      | 8.69643E-05   | 0.04753519      | significant     |
|             | L37    | 0.0674      | 0.000120357   | 0.065182594     | Non significant |
| L38         | 0.034  | 6.07143E-05 | 0.033429493   | significant     |                 |
| L44         | 0.055  | 9.82143E-05 | 0.053517409   | Non significant |                 |
| L51         | 0.056  | 0.0001      | 0.054463512   | Non significant |                 |
|             |        |             |               |                 |                 |
|             | L3     | 0.0475      | 8.48214E-05   | 0.046391448     | significant     |
|             | L4     | 0.054       | 9.64286E-05   | 0.05257036      | Non significant |

|              |        |             |             |                 |                 |
|--------------|--------|-------------|-------------|-----------------|-----------------|
| BPT-BPH-12 h | L5     | 0.0642      | 0.000114643 | 0.062186034     | Non significant |
|              | L6     | 0.053       | 9.46429E-05 | 0.051622366     | Non significant |
|              | L7     | 0.231       | 0.0004125   | 0.20629836      | significant     |
|              | L8     | 0.579       | 0.001033929 | 0.439709303     | non significant |
|              | L10    | 0.0511      | 0.00009125  | 0.049818568     | Non significant |
|              | L11    | 0.0438      | 7.82143E-05 | 0.042856272     | significant     |
|              | L12    | 0.0549      | 9.80357E-05 | 0.053422746     | Non significant |
|              | L13a   | 0.0486      | 8.67857E-05 | 0.047439931     | significant     |
|              | L13b   | 0.0457      | 8.16071E-05 | 0.044673264     | significant     |
|              | L14    | 0.0622      | 0.000111071 | 0.060308317     | Non significant |
|              | L15    | 0.0248      | 4.42857E-05 | 0.024495542     | significant     |
|              | L18a   | 0.0415      | 7.41071E-05 | 0.04065214      | significant     |
|              | L18p   | 0.0487      | 8.69643E-05 | 0.04753519      | significant     |
|              | L19.3  | 0.0458      | 8.17857E-05 | 0.044768799     | significant     |
|              | L21.2  | 0.0481      | 8.58929E-05 | 0.04696349      | significant     |
|              | L22    | 0.0477      | 8.51786E-05 | 0.046582167     | significant     |
|              | L23A   | 0.0387      | 6.91071E-05 | 0.037962009     | significant     |
|              | L24a   | 0.0621      | 0.000110893 | 0.060214333     | Non significant |
|              | L24b   | 0.0143      | 2.55357E-05 | 0.014198421     | significant     |
|              | L26.1  | 0.0342      | 6.10714E-05 | 0.0336228       | significant     |
|              | L27.3  | 0.0428      | 7.64286E-05 | 0.041898576     | significant     |
|              | L28    | 0.0491      | 8.76786E-05 | 0.047916133     | significant     |
|              | L29    | 0.0438      | 7.82143E-05 | 0.042856272     | significant     |
|              | L30e   | 0.0593      | 0.000105893 | 0.05757896      | Non significant |
|              | L31    | 0.0451      | 8.05357E-05 | 0.044099849     | significant     |
|              | L32    | 0.0473      | 8.44643E-05 | 0.046200691     | significant     |
|              | L34    | 0.0515      | 9.19643E-05 | 0.050198599     | Non significant |
|              | L35a.3 | 0.0571      | 0.000101964 | 0.055503135     | Non significant |
|              | L36.2  | 0.0052      | 9.28571E-06 | 0.005186527     | significant     |
|              | L37    | 0.0565      | 0.000100893 | 0.054936209     | Non significant |
| L38          | 0.0453 | 8.08929E-05 | 0.044291026 | significant     |                 |
| L44          | 0.0507 | 9.05357E-05 | 0.049438385 | Non significant |                 |
| L51          | 0.0526 | 9.39286E-05 | 0.051242904 | Non significant |                 |
|              |        |             |             |                 |                 |
| BPT-GM-24 h  | L3     | 0.0411      | 7.33929E-05 | 0.040268296     | significant     |
|              | L4     | 0.0405      | 7.23214E-05 | 0.039692242     | significant     |
|              | L5     | 0.0425      | 7.58929E-05 | 0.04161108      | significant     |
|              | L6     | 0.0645      | 0.000115179 | 0.062467368     | Non significant |
|              | L7     | 0.0515      | 9.19643E-05 | 0.050198599     | Non significant |
|              | L8     | 0.0615      | 0.000109821 | 0.05965023      | Non significant |
|              | L10    | 0.0715      | 0.000127679 | 0.069007972     | Non significant |
|              | L11    | 0.0615      | 0.000109821 | 0.05965023      | Non significant |
|              | L12    | 0.0531      | 9.48214E-05 | 0.051717208     | Non significant |
|              | L13a   | 0.0321      | 5.73214E-05 | 0.031591155     | significant     |



|              |        |        |             |             |                 |
|--------------|--------|--------|-------------|-------------|-----------------|
|              | L13b   | 0.0615 | 0.000109821 | 0.05965023  | Non significant |
|              | L14    | 0.0601 | 0.000107321 | 0.058332675 | Non significant |
|              | L15    | 0.0413 | 0.00007375  | 0.040460237 | significant     |
|              | L18a   | 0.0572 | 0.000102143 | 0.05559759  | Non significant |
|              | L18p   | 0.0486 | 8.67857E-05 | 0.047439931 | significant     |
|              | L19.3  | 0.0618 | 0.000110357 | 0.059932324 | Non significant |
|              | L21.2  | 0.0517 | 9.23214E-05 | 0.050388558 | Non significant |
|              | L22    | 0.0562 | 0.000100357 | 0.054652619 | Non significant |
|              | L23A   | 0.0211 | 3.76786E-05 | 0.020879342 | significant     |
|              | L24a   | 0.0295 | 5.26786E-05 | 0.029069877 | significant     |
|              | L24b   | 0.0372 | 6.64286E-05 | 0.036517771 | significant     |
|              | L26.1  | 0.0493 | 8.80357E-05 | 0.048106548 | significant     |
|              | L27.3  | 0.0483 | 0.00008625  | 0.047154095 | significant     |
|              | L28    | 0.0421 | 7.51786E-05 | 0.041227619 | significant     |
|              | L29    | 0.0571 | 0.000101964 | 0.055503135 | Non significant |
|              | L30e   | 0.0421 | 7.51786E-05 | 0.041227619 | significant     |
|              | L31    | 0.0561 | 0.000100179 | 0.05455807  | Non significant |
|              | L32    | 0.0521 | 9.30357E-05 | 0.050768362 | Non significant |
|              | L34    | 0.0526 | 9.39286E-05 | 0.051242904 | Non significant |
|              | L35a.3 | 0.0513 | 9.16071E-05 | 0.050008603 | Non significant |
|              | L36.2  | 0.0415 | 7.41071E-05 | 0.04065214  | significant     |
|              | L37    | 0.0408 | 7.28571E-05 | 0.039980312 | significant     |
|              | L38    | 0.0531 | 9.48214E-05 | 0.051717208 | Non significant |
|              | L44    | 0.0476 | 0.000085    | 0.046486812 | significant     |
|              | L51    | 0.0656 | 0.000117143 | 0.063498207 | Non significant |
|              |        |        |             |             |                 |
| BPT-GM-120 h | L3     | 0.0351 | 6.26786E-05 | 0.034492202 | significant     |
|              | L4     | 0.0631 | 0.000112679 | 0.061153754 | Non significant |
|              | L5     | 0.0536 | 9.57143E-05 | 0.052191276 | Non significant |
|              | L6     | 0.0518 | 0.0000925   | 0.050483523 | Non significant |
|              | L7     | 0.0513 | 9.16071E-05 | 0.050008603 | Non significant |
|              | L8     | 0.0424 | 7.57143E-05 | 0.041515229 | significant     |
|              | L10    | 0.064  | 0.000114286 | 0.061998431 | Non significant |
|              | L11    | 0.0417 | 7.44643E-05 | 0.040844005 | significant     |
|              | L12    | 0.0581 | 0.00010375  | 0.056447257 | Non significant |
|              | L13a   | 0.0541 | 9.66071E-05 | 0.052665108 | Non significant |
|              | L13b   | 0.0602 | 0.0001075   | 0.058426847 | Non significant |
|              | L14    | 0.0623 | 0.00011125  | 0.060402292 | Non significant |
|              | L15    | 0.0518 | 0.0000925   | 0.050483523 | Non significant |
|              | L18a   | 0.0418 | 7.46429E-05 | 0.040939923 | significant     |
|              | L18p   | 0.0493 | 8.80357E-05 | 0.048106548 | significant     |
|              | L19.3  | 0.0716 | 0.000127857 | 0.069101079 | Non significant |
|              | L21.2  | 0.0215 | 3.83929E-05 | 0.021270926 | significant     |

|              |        |        |             |             |                 |
|--------------|--------|--------|-------------|-------------|-----------------|
|              | L22    | 0.0625 | 0.000111607 | 0.060590214 | Non significant |
|              | L23A   | 0.0437 | 7.80357E-05 | 0.042760546 | significant     |
|              | L24a   | 0.0481 | 8.58929E-05 | 0.04696349  | significant     |
|              | L24b   | 0.0547 | 9.76786E-05 | 0.053233393 | Non significant |
|              | L26.1  | 0.0457 | 8.16071E-05 | 0.044673264 | significant     |
|              | L27.3  | 0.0512 | 9.14286E-05 | 0.04991359  | significant     |
|              | L28    | 0.0521 | 9.30357E-05 | 0.050768362 | Non significant |
|              | L29    | 0.0381 | 6.80357E-05 | 0.037384573 | significant     |
|              | L30e   | 0.0316 | 5.64286E-05 | 0.031106802 | significant     |
|              | L31    | 0.048  | 8.57143E-05 | 0.046868174 | significant     |
|              | L32    | 0.0391 | 6.98214E-05 | 0.038346774 | significant     |
|              | L34    | 0.0621 | 0.000110893 | 0.060214333 | Non significant |
|              | L35a.3 | 0.0361 | 6.44643E-05 | 0.035457288 | significant     |
|              | L36.2  | 0.0485 | 8.66071E-05 | 0.047344662 | significant     |
|              | L37    | 0.0561 | 0.000100179 | 0.05455807  | Non significant |
|              | L38    | 0.0321 | 5.73214E-05 | 0.031591155 | significant     |
|              | L44    | 0.0319 | 5.69643E-05 | 0.031397443 | significant     |
|              | L51    | 0.0421 | 7.51786E-05 | 0.041227619 | significant     |
|              |        |        |             |             |                 |
| RPNF-BPH-6 h | L3     | 0.0491 | 8.76786E-05 | 0.047916133 | significant     |
|              | L4     | 0.4723 | 0.000843393 | 0.376557837 | significant     |
|              | L5     | 0.0681 | 0.000121607 | 0.065836816 | Non significant |
|              | L6     | 0.0677 | 0.000120893 | 0.065463031 | Non significant |
|              | L7     | 0.0218 | 3.89286E-05 | 0.021564513 | significant     |
|              | L8     | 0.0567 | 0.00010125  | 0.055125222 | Non significant |
|              | L10    | 0.0513 | 9.16071E-05 | 0.050008603 | Non significant |
|              | L11    | 0.0351 | 6.26786E-05 | 0.034492202 | significant     |
|              | L12    | 0.0495 | 8.83929E-05 | 0.048296924 | significant     |
|              | L13a   | 0.0592 | 0.000105714 | 0.057484703 | Non significant |
|              | L13b   | 0.0711 | 0.000126964 | 0.068635454 | Non significant |
|              | L14    | 0.0534 | 9.53571E-05 | 0.052001677 | Non significant |
|              | L15    | 0.0395 | 7.05357E-05 | 0.038731385 | significant     |
|              | L18a   | 0.0478 | 8.53571E-05 | 0.046677512 | significant     |
|              | L18p   | 0.0514 | 9.17857E-05 | 0.050103606 | Non significant |
|              | L19.3  | 0.0361 | 6.44643E-05 | 0.035457288 | significant     |
|              | L21.2  | 0.0442 | 7.89286E-05 | 0.043239083 | significant     |
|              | L22    | 0.0589 | 0.000105179 | 0.057201876 | Non significant |
|              | L23A   | 0.0415 | 7.41071E-05 | 0.04065214  | significant     |
|              | L24a   | 0.0565 | 0.000100893 | 0.054936209 | Non significant |
|              | L24b   | 0.0425 | 7.58929E-05 | 0.04161108  | significant     |
|              | L26.1  | 0.0529 | 9.44643E-05 | 0.051527515 | Non significant |
|              | L27.3  | 0.0461 | 8.23214E-05 | 0.045055349 | significant     |
|              | L28    | 0.0536 | 9.57143E-05 | 0.052191276 | Non significant |
|              | L29    | 0.0575 | 0.000102679 | 0.055880897 | Non significant |

|               |        |        |             |             |                 |
|---------------|--------|--------|-------------|-------------|-----------------|
|               | L30e   | 0.0441 | 0.00007875  | 0.043143395 | significant     |
|               | L31    | 0.0391 | 6.98214E-05 | 0.038346774 | significant     |
|               | L32    | 0.0435 | 7.76786E-05 | 0.042569064 | significant     |
|               | L34    | 0.0391 | 6.98214E-05 | 0.038346774 | significant     |
|               | L35a.3 | 0.0724 | 0.000129286 | 0.069845596 | Non significant |
|               | L36.2  | 0.0471 | 8.41071E-05 | 0.046009896 | significant     |
|               | L37    | 0.0631 | 0.000112679 | 0.061153754 | Non significant |
|               | L38    | 0.0472 | 8.42857E-05 | 0.046105298 | significant     |
|               | L44    | 0.0631 | 0.000112679 | 0.061153754 | Non significant |
|               | L51    | 0.0397 | 7.08929E-05 | 0.038923633 | significant     |
|               |        |        |             |             |                 |
| RPNF-BPH-12 h | L3     | 0.0652 | 0.000116429 | 0.063123488 | Non significant |
|               | L4     | 0.0543 | 9.69643E-05 | 0.052854574 | Non significant |
|               | L5     | 0.0491 | 8.76786E-05 | 0.047916133 | significant     |
|               | L6     | 0.0473 | 8.44643E-05 | 0.046200691 | significant     |
|               | L7     | 0.0359 | 6.41071E-05 | 0.035264348 | significant     |
|               | L8     | 0.0641 | 0.000114464 | 0.062092237 | Non significant |
|               | L10    | 0.0512 | 9.14286E-05 | 0.04991359  | significant     |
|               | L11    | 0.0439 | 7.83929E-05 | 0.042951989 | significant     |
|               | L12    | 0.0627 | 0.000111964 | 0.060778098 | Non significant |
|               | L13a   | 0.0491 | 8.76786E-05 | 0.047916133 | significant     |
|               | L13b   | 0.0613 | 0.000109464 | 0.059462121 | Non significant |
|               | L14    | 0.0517 | 9.23214E-05 | 0.050388558 | Non significant |
|               | L15    | 0.0339 | 6.05357E-05 | 0.033332825 | significant     |
|               | L18a   | 0.0389 | 6.94643E-05 | 0.038154411 | significant     |
|               | L18p   | 0.0351 | 6.26786E-05 | 0.034492202 | significant     |
|               | L19.3  | 0.0491 | 8.76786E-05 | 0.047916133 | significant     |
|               | L21.2  | 0.0512 | 9.14286E-05 | 0.04991359  | significant     |
|               | L22    | 0.0479 | 8.55357E-05 | 0.046772848 | significant     |
|               | L23A   | 0.0665 | 0.00011875  | 0.064340779 | Non significant |
|               | L24a   | 0.0654 | 0.000116786 | 0.063310866 | Non significant |
|               | L24b   | 0.0461 | 8.23214E-05 | 0.045055349 | significant     |
|               | L26.1  | 0.0725 | 0.000129464 | 0.069938619 | Non significant |
|               | L27.3  | 0.0458 | 8.17857E-05 | 0.044768799 | significant     |
|               | L28    | 0.0651 | 0.00011625  | 0.063029784 | Non significant |
|               | L29    | 0.0417 | 7.44643E-05 | 0.040844005 | significant     |
|               | L30e   | 0.0429 | 7.66071E-05 | 0.041994388 | significant     |
|               | L31    | 0.0615 | 0.000109821 | 0.05965023  | Non significant |
|               | L32    | 0.0451 | 8.05357E-05 | 0.044099849 | significant     |
|               | L34    | 0.0629 | 0.000112321 | 0.060965945 | Non significant |
|               | L35a.3 | 0.0517 | 9.23214E-05 | 0.050388558 | Non significant |
|               | L36.2  | 0.0524 | 9.35714E-05 | 0.051053115 | Non significant |
|               | L37    | 0.0517 | 9.23214E-05 | 0.050388558 | Non significant |

|               |        |        |             |             |                 |
|---------------|--------|--------|-------------|-------------|-----------------|
|               | L38    | 0.0419 | 7.48214E-05 | 0.041035831 | significant     |
|               | L44    | 0.0401 | 7.16071E-05 | 0.039308014 | significant     |
|               | L51    | 0.0391 | 6.98214E-05 | 0.038346774 | significant     |
|               |        |        |             |             |                 |
| RPNF-GM-24 h  | L3     | 0.0349 | 6.23214E-05 | 0.034299069 | significant     |
|               | L4     | 0.0542 | 9.67857E-05 | 0.052759846 | Non significant |
|               | L5     | 0.0452 | 8.07143E-05 | 0.044195442 | significant     |
|               | L6     | 0.0612 | 0.000109286 | 0.059368052 | Non significant |
|               | L7     | 0.0542 | 9.67857E-05 | 0.052759846 | Non significant |
|               | L8     | 0.0418 | 7.46429E-05 | 0.040939923 | significant     |
|               | L10    | 0.0521 | 9.30357E-05 | 0.050768362 | Non significant |
|               | L11    | 0.0624 | 0.000111429 | 0.060496258 | Non significant |
|               | L12    | 0.0421 | 7.51786E-05 | 0.041227619 | significant     |
|               | L13a   | 0.0426 | 7.60714E-05 | 0.041706922 | significant     |
|               | L13b   | 0.0349 | 6.23214E-05 | 0.034299069 | significant     |
|               | L14    | 0.0397 | 7.08929E-05 | 0.038923633 | significant     |
|               | L15    | 0.0514 | 9.17857E-05 | 0.050103606 | Non significant |
|               | L18a   | 0.0573 | 0.000102321 | 0.055692035 | Non significant |
|               | L18p   | 0.0566 | 0.000101071 | 0.055030721 | Non significant |
|               | L19.3  | 0.0391 | 6.98214E-05 | 0.038346774 | significant     |
|               | L21.2  | 0.0694 | 0.000123929 | 0.067050588 | Non significant |
|               | L22    | 0.0651 | 0.00011625  | 0.063029784 | Non significant |
|               | L23A   | 0.0519 | 9.26786E-05 | 0.050578479 | Non significant |
|               | L24a   | 0.0325 | 5.80357E-05 | 0.031978463 | significant     |
|               | L24b   | 0.0561 | 0.000100179 | 0.05455807  | Non significant |
|               | L26.1  | 0.0614 | 0.000109643 | 0.05955618  | Non significant |
|               | L27.3  | 0.0321 | 5.73214E-05 | 0.031591155 | significant     |
|               | L28    | 0.0612 | 0.000109286 | 0.059368052 | Non significant |
|               | L29    | 0.0577 | 0.000103036 | 0.056069721 | Non significant |
|               | L30e   | 0.0513 | 9.16071E-05 | 0.050008603 | Non significant |
|               | L31    | 0.0299 | 5.33929E-05 | 0.029458192 | significant     |
|               | L32    | 0.0712 | 0.000127143 | 0.068728597 | Non significant |
|               | L34    | 0.0563 | 0.000100536 | 0.054747159 | Non significant |
|               | L35a.3 | 0.0381 | 6.80357E-05 | 0.037384573 | significant     |
|               | L36.2  | 0.0398 | 7.10714E-05 | 0.039019743 | significant     |
|               | L37    | 0.0513 | 9.16071E-05 | 0.050008603 | Non significant |
|               | L38    | 0.0624 | 0.000111429 | 0.060496258 | Non significant |
|               | L44    | 0.0528 | 9.42857E-05 | 0.051432654 | Non significant |
|               | L51    | 0.0472 | 8.42857E-05 | 0.046105298 | significant     |
|               |        |        |             |             |                 |
| RPNF-GM-120 h | L3     | 0.0612 | 0.000109286 | 0.059368052 | Non significant |
|               | L4     | 0.0527 | 9.41071E-05 | 0.051337783 | Non significant |
|               | L5     | 0.0513 | 9.16071E-05 | 0.050008603 | Non significant |
|               | L6     | 0.0396 | 7.07143E-05 | 0.038827514 | significant     |

|        |        |             |             |                 |
|--------|--------|-------------|-------------|-----------------|
| L7     | 0.0651 | 0.00011625  | 0.063029784 | Non significant |
| L8     | 0.0681 | 0.000121607 | 0.065836816 | Non significant |
| L10    | 0.0419 | 7.48214E-05 | 0.041035831 | significant     |
| L11    | 0.0617 | 0.000110179 | 0.059838302 | Non significant |
| L12    | 0.0419 | 7.48214E-05 | 0.041035831 | significant     |
| L13a   | 0.0621 | 0.000110893 | 0.060214333 | Non significant |
| L13b   | 0.0451 | 8.05357E-05 | 0.044099849 | significant     |
| L14    | 0.0389 | 6.94643E-05 | 0.038154411 | significant     |
| L15    | 0.0316 | 5.64286E-05 | 0.031106802 | significant     |
| L18a   | 0.0531 | 9.48214E-05 | 0.051717208 | Non significant |
| L18p   | 0.0381 | 6.80357E-05 | 0.037384573 | significant     |
| L19.3  | 0.0524 | 9.35714E-05 | 0.051053115 | Non significant |
| L21.2  | 0.0461 | 8.23214E-05 | 0.045055349 | significant     |
| L22    | 0.0651 | 0.00011625  | 0.063029784 | Non significant |
| L23A   | 0.0397 | 7.08929E-05 | 0.038923633 | significant     |
| L24a   | 0.0514 | 9.17857E-05 | 0.050103606 | Non significant |
| L24b   | 0.0591 | 0.000105536 | 0.057390437 | Non significant |
| L26.1  | 0.0391 | 6.98214E-05 | 0.038346774 | significant     |
| L27.3  | 0.0541 | 9.66071E-05 | 0.052665108 | Non significant |
| L28    | 0.0349 | 6.23214E-05 | 0.034299069 | significant     |
| L29    | 0.0316 | 5.64286E-05 | 0.031106802 | significant     |
| L30e   | 0.0421 | 7.51786E-05 | 0.041227619 | significant     |
| L31    | 0.0582 | 0.000103929 | 0.056541617 | Non significant |
| L32    | 0.0526 | 9.39286E-05 | 0.051242904 | Non significant |
| L34    | 0.0486 | 8.67857E-05 | 0.047439931 | significant     |
| L35a.3 | 0.0612 | 0.000109286 | 0.059368052 | Non significant |
| L36.2  | 0.0412 | 7.35714E-05 | 0.040364271 | significant     |
| L37    | 0.0615 | 0.000109821 | 0.05965023  | Non significant |
| L38    | 0.0422 | 7.53571E-05 | 0.041323499 | significant     |
| L44    | 0.0433 | 7.73214E-05 | 0.042377543 | significant     |
| L51    | 0.0601 | 0.000107321 | 0.058332675 | Non significant |

**Supplementary Table. 5. Adjustment of *P* values of *RPS* genes calculated through two-way ANOVA by Bonferroni correction.**

| Treatment   | Gene | p-value | alpha altered | alpha critical | Significance    |
|-------------|------|---------|---------------|----------------|-----------------|
| BPT-BPH-6 h | S3a  | 0.0451  | 8.05357E-05   | 0.044099849    | significant     |
|             | S4   | 0.0662  | 0.000118214   | 0.064060006    | Non significant |
|             | S4a  | 0.0624  | 0.000111429   | 0.060496258    | Non significant |
|             | S5   | 0.0341  | 6.08929E-05   | 0.033526151    | significant     |
|             | S5a  | 0.0712  | 0.000127143   | 0.068728597    | Non significant |
|             | S6   | 0.0516  | 9.21429E-05   | 0.050293584    | Non significant |
|             | S6a  | 0.0593  | 0.000105893   | 0.05757896     | Non significant |
|             | S7   | 0.0398  | 7.10714E-05   | 0.039019743    | significant     |
|             | S7a  | 0.0495  | 8.83929E-05   | 0.048296924    | significant     |

|              |      |        |             |             |                 |
|--------------|------|--------|-------------|-------------|-----------------|
|              | S9   | 0.0491 | 8.76786E-05 | 0.047916133 | significant     |
|              | S9-2 | 0.0396 | 7.07143E-05 | 0.038827514 | significant     |
|              | S10  | 0.0416 | 7.42857E-05 | 0.040748077 | significant     |
|              | S10a | 0.0323 | 5.76786E-05 | 0.031784828 | significant     |
|              | S13  | 0.0461 | 8.23214E-05 | 0.045055349 | significant     |
|              | S13a | 0.0531 | 9.48214E-05 | 0.051717208 | Non significant |
|              | S15  | 0.0658 | 0.0001175   | 0.063685511 | Non significant |
|              | S15a | 0.0582 | 0.000103929 | 0.056541617 | Non significant |
|              | S17  | 0.0321 | 5.73214E-05 | 0.031591155 | significant     |
|              | S18  | 0.0435 | 7.76786E-05 | 0.042569064 | significant     |
|              | S18a | 0.0391 | 6.98214E-05 | 0.038346774 | significant     |
|              | S18b | 0.0521 | 9.30357E-05 | 0.050768362 | Non significant |
|              | S19  | 0.0541 | 9.66071E-05 | 0.052665108 | Non significant |
|              | S20  | 0.0339 | 6.05357E-05 | 0.033332825 | significant     |
|              | S21  | 0.0419 | 7.48214E-05 | 0.041035831 | significant     |
|              | S23  | 0.0537 | 9.58929E-05 | 0.052286061 | Non significant |
|              | S23a | 0.0281 | 5.01786E-05 | 0.027709553 | significant     |
|              | S24  | 0.0675 | 0.000120536 | 0.065276082 | Non significant |
|              | S25  | 0.0681 | 0.000121607 | 0.065836816 | Non significant |
|              | S25a | 0.0458 | 8.17857E-05 | 0.044768799 | significant     |
|              | S26  | 0.0645 | 0.000115179 | 0.062467368 | Non significant |
|              | S27  | 0.0391 | 6.98214E-05 | 0.038346774 | significant     |
|              | S27a | 0.0433 | 7.73214E-05 | 0.042377543 | significant     |
|              | S28  | 0.0615 | 0.000109821 | 0.05965023  | Non significant |
|              | S29  | 0.0381 | 6.80357E-05 | 0.037384573 | significant     |
|              | S30  | 0.0714 | 0.0001275   | 0.068914857 | Non significant |
|              |      |        |             |             |                 |
| BPT-BPH-12 h | S3a  | 0.0591 | 0.000105536 | 0.057390437 | Non significant |
|              | S4   | 0.0632 | 0.000112857 | 0.061247644 | Non significant |
|              | S4a  | 0.0582 | 0.000103929 | 0.056541617 | Non significant |
|              | S5   | 0.0425 | 7.58929E-05 | 0.04161108  | significant     |
|              | S5a  | 0.0327 | 5.83929E-05 | 0.032172059 | significant     |
|              | S6   | 0.0612 | 0.000109286 | 0.059368052 | Non significant |
|              | S6a  | 0.0572 | 0.000102143 | 0.05559759  | Non significant |
|              | S7   | 0.0354 | 6.32143E-05 | 0.034781829 | significant     |
|              | S7a  | 0.0671 | 0.000119821 | 0.064902073 | Non significant |
|              | S9   | 0.0316 | 5.64286E-05 | 0.031106802 | significant     |
|              | S9-2 | 0.0521 | 9.30357E-05 | 0.050768362 | Non significant |
|              | S10  | 0.0327 | 5.83929E-05 | 0.032172059 | significant     |
|              | S10a | 0.0592 | 0.000105714 | 0.057484703 | Non significant |
|              | S13  | 0.0618 | 0.000110357 | 0.059932324 | Non significant |
|              | S13a | 0.0472 | 8.42857E-05 | 0.046105298 | significant     |
|              | S15  | 0.0378 | 0.0000675   | 0.037095726 | significant     |
|              | S15a | 0.0471 | 8.41071E-05 | 0.046009896 | significant     |

|             |      |        |             |             |                 |
|-------------|------|--------|-------------|-------------|-----------------|
|             | S17  | 0.0496 | 8.85714E-05 | 0.048392098 | significant     |
|             | S18  | 0.0687 | 0.000122679 | 0.066397214 | Non significant |
|             | S18a | 0.0635 | 0.000113393 | 0.06152926  | Non significant |
|             | S18b | 0.0615 | 0.000109821 | 0.05965023  | Non significant |
|             | S19  | 0.0359 | 6.41071E-05 | 0.035264348 | significant     |
|             | S20  | 0.0423 | 7.55357E-05 | 0.041419369 | significant     |
|             | S21  | 0.0607 | 0.000108393 | 0.058897567 | Non significant |
|             | S23  | 0.0328 | 5.85714E-05 | 0.032268843 | significant     |
|             | S23a | 0.0436 | 7.78571E-05 | 0.042664809 | significant     |
|             | S24  | 0.0553 | 0.00009875  | 0.053801339 | Non significant |
|             | S25  | 0.0409 | 7.30357E-05 | 0.040076316 | significant     |
|             | S25a | 0.0583 | 0.000104107 | 0.056635968 | Non significant |
|             | S26  | 0.0691 | 0.000123393 | 0.066770627 | Non significant |
|             | S27  | 0.0421 | 7.51786E-05 | 0.041227619 | significant     |
|             | S27a | 0.0642 | 0.000114643 | 0.062186034 | Non significant |
|             | S28  | 0.0371 | 0.00006625  | 0.036421412 | significant     |
|             | S29  | 0.0523 | 9.33929E-05 | 0.050958207 | Non significant |
|             | S30  | 0.0582 | 0.000103929 | 0.056541617 | Non significant |
|             |      |        |             |             |                 |
| BPT-GM-24 h | S3a  | 0.0431 | 7.69643E-05 | 0.042185985 | significant     |
|             | S4   | 0.0392 | 0.00007     | 0.038442941 | significant     |
|             | S4a  | 0.0686 | 0.0001225   | 0.066303838 | Non significant |
|             | S5   | 0.0578 | 0.000103214 | 0.056164119 | Non significant |
|             | S5a  | 0.0619 | 0.000110536 | 0.060026336 | Non significant |
|             | S6   | 0.0439 | 7.83929E-05 | 0.042951989 | significant     |
|             | S6a  | 0.0691 | 0.000123393 | 0.066770627 | Non significant |
|             | S7   | 0.0311 | 5.55357E-05 | 0.030622207 | significant     |
|             | S7a  | 0.0415 | 7.41071E-05 | 0.04065214  | significant     |
|             | S9   | 0.0639 | 0.000114107 | 0.061904616 | Non significant |
|             | S9-2 | 0.0295 | 5.26786E-05 | 0.029069877 | significant     |
|             | S10  | 0.0432 | 7.71429E-05 | 0.042281769 | significant     |
|             | S10a | 0.0615 | 0.000109821 | 0.05965023  | Non significant |
|             | S13  | 0.0561 | 0.000100179 | 0.05455807  | Non significant |
|             | S13a | 0.0435 | 7.76786E-05 | 0.042569064 | significant     |
|             | S15  | 0.0435 | 7.76786E-05 | 0.042569064 | significant     |
|             | S15a | 0.0655 | 0.000116964 | 0.063404541 | Non significant |
|             | S17  | 0.0583 | 0.000104107 | 0.056635968 | Non significant |
|             | S18  | 0.0696 | 0.000124286 | 0.067237183 | Non significant |
|             | S18a | 0.0484 | 8.64286E-05 | 0.047249383 | significant     |
|             | S18b | 0.0332 | 5.92857E-05 | 0.032655881 | significant     |
|             | S19  | 0.0512 | 9.14286E-05 | 0.04991359  | significant     |
|             | S20  | 0.0394 | 7.03571E-05 | 0.038635247 | significant     |
|             | S21  | 0.0412 | 7.35714E-05 | 0.040364271 | significant     |

|              |      |        |             |             |                 |
|--------------|------|--------|-------------|-------------|-----------------|
|              | S23  | 0.0605 | 0.000108036 | 0.058709307 | Non significant |
|              | S23a | 0.0452 | 8.07143E-05 | 0.044195442 | significant     |
|              | S24  | 0.0395 | 7.05357E-05 | 0.038731385 | significant     |
|              | S25  | 0.0615 | 0.000109821 | 0.05965023  | Non significant |
|              | S25a | 0.0389 | 6.94643E-05 | 0.038154411 | significant     |
|              | S26  | 0.0523 | 9.33929E-05 | 0.050958207 | Non significant |
|              | S27  | 0.0561 | 0.000100179 | 0.05455807  | Non significant |
|              | S27a | 0.0415 | 7.41071E-05 | 0.04065214  | significant     |
|              | S28  | 0.0587 | 0.000104821 | 0.057013278 | Non significant |
|              | S29  | 0.0661 | 0.000118036 | 0.063966396 | Non significant |
|              | S30  | 0.0603 | 0.000107679 | 0.05852101  | Non significant |
|              |      |        |             |             |                 |
| BPT-GM-120 h | S3a  | 0.0564 | 0.000100714 | 0.054841689 | Non significant |
|              | S4   | 0.0423 | 7.55357E-05 | 0.041419369 | significant     |
|              | S4a  | 0.0472 | 8.42857E-05 | 0.046105298 | significant     |
|              | S5   | 0.0486 | 8.67857E-05 | 0.047439931 | significant     |
|              | S5a  | 0.0581 | 0.00010375  | 0.056447257 | Non significant |
|              | S6   | 0.0435 | 7.76786E-05 | 0.042569064 | significant     |
|              | S6a  | 0.0532 | 0.000095    | 0.051812041 | Non significant |
|              | S7   | 0.0615 | 0.000109821 | 0.05965023  | Non significant |
|              | S7a  | 0.0571 | 0.000101964 | 0.055503135 | Non significant |
|              | S9   | 0.0591 | 0.000105536 | 0.057390437 | Non significant |
|              | S9-2 | 0.0651 | 0.00011625  | 0.063029784 | Non significant |
|              | S10  | 0.0412 | 7.35714E-05 | 0.040364271 | significant     |
|              | S10a | 0.0631 | 0.000112679 | 0.061153754 | Non significant |
|              | S13  | 0.0415 | 7.41071E-05 | 0.04065214  | significant     |
|              | S13a | 0.0612 | 0.000109286 | 0.059368052 | Non significant |
|              | S15  | 0.0528 | 9.42857E-05 | 0.051432654 | Non significant |
|              | S15a | 0.0618 | 0.000110357 | 0.059932324 | Non significant |
|              | S17  | 0.0539 | 0.00009625  | 0.052475604 | Non significant |
|              | S18  | 0.0429 | 7.66071E-05 | 0.041994388 | significant     |
|              | S18a | 0.0612 | 0.000109286 | 0.059368052 | Non significant |
|              | S18b | 0.0435 | 7.76786E-05 | 0.042569064 | significant     |
|              | S19  | 0.0412 | 7.35714E-05 | 0.040364271 | significant     |
|              | S20  | 0.0567 | 0.00010125  | 0.055125222 | Non significant |
|              | S21  | 0.0485 | 8.66071E-05 | 0.047344662 | significant     |
|              | S23  | 0.0615 | 0.000109821 | 0.05965023  | Non significant |
|              | S23a | 0.0425 | 7.58929E-05 | 0.04161108  | significant     |
|              | S24  | 0.0651 | 0.00011625  | 0.063029784 | Non significant |
|              | S25  | 0.0435 | 7.76786E-05 | 0.042569064 | significant     |
|              | S25a | 0.0416 | 7.42857E-05 | 0.040748077 | significant     |
|              | S26  | 0.0461 | 8.23214E-05 | 0.045055349 | significant     |
|              | S27  | 0.0655 | 0.000116964 | 0.063404541 | Non significant |
|              | S27a | 0.0365 | 6.51786E-05 | 0.035843053 | significant     |



|               |      |        |             |             |                 |
|---------------|------|--------|-------------|-------------|-----------------|
|               | S28  | 0.0615 | 0.000109821 | 0.05965023  | Non significant |
|               | S29  | 0.0451 | 8.05357E-05 | 0.044099849 | significant     |
|               | S30  | 0.0568 | 0.000101429 | 0.055219715 | Non significant |
|               |      |        |             |             |                 |
| RPNF-BPH-6 h  | S3a  | 0.0651 | 0.00011625  | 0.063029784 | Non significant |
|               | S4   | 0.0509 | 9.08929E-05 | 0.049628495 | significant     |
|               | S4a  | 0.0345 | 6.16071E-05 | 0.033912687 | significant     |
|               | S5   | 0.0566 | 0.000101071 | 0.055030721 | Non significant |
|               | S5a  | 0.0342 | 6.10714E-05 | 0.0336228   | significant     |
|               | S6   | 0.0567 | 0.00010125  | 0.055125222 | Non significant |
|               | S6a  | 0.0456 | 8.14286E-05 | 0.044577719 | significant     |
|               | S7   | 0.0415 | 7.41071E-05 | 0.04065214  | significant     |
|               | S7a  | 0.0523 | 9.33929E-05 | 0.050958207 | Non significant |
|               | S9   | 0.0652 | 0.000116429 | 0.063123488 | Non significant |
|               | S9-2 | 0.0468 | 8.35714E-05 | 0.045723632 | significant     |
|               | S10  | 0.0615 | 0.000109821 | 0.05965023  | Non significant |
|               | S10a | 0.0545 | 9.73214E-05 | 0.053044003 | Non significant |
|               | S13  | 0.0528 | 9.42857E-05 | 0.051432654 | Non significant |
|               | S13a | 0.0639 | 0.000114107 | 0.061904616 | Non significant |
|               | S15  | 0.0522 | 9.32143E-05 | 0.050863289 | Non significant |
|               | S15a | 0.0715 | 0.000127679 | 0.069007972 | Non significant |
|               | S17  | 0.0563 | 0.000100536 | 0.054747159 | Non significant |
|               | S18  | 0.0359 | 6.41071E-05 | 0.035264348 | significant     |
|               | S18a | 0.0481 | 8.58929E-05 | 0.04696349  | significant     |
|               | S18b | 0.0437 | 7.80357E-05 | 0.042760546 | significant     |
|               | S19  | 0.0375 | 6.69643E-05 | 0.036806792 | significant     |
|               | S20  | 0.0528 | 9.42857E-05 | 0.051432654 | Non significant |
|               | S21  | 0.0458 | 8.17857E-05 | 0.044768799 | significant     |
|               | S23  | 0.0332 | 5.92857E-05 | 0.032655881 | significant     |
|               | S23a | 0.0486 | 8.67857E-05 | 0.047439931 | significant     |
|               | S24  | 0.0687 | 0.000122679 | 0.066397214 | Non significant |
|               | S25  | 0.0618 | 0.000110357 | 0.059932324 | Non significant |
|               | S25a | 0.0545 | 9.73214E-05 | 0.053044003 | Non significant |
|               | S26  | 0.0625 | 0.000111607 | 0.060590214 | Non significant |
|               | S27  | 0.0349 | 6.23214E-05 | 0.034299069 | significant     |
|               | S27a | 0.0535 | 9.55357E-05 | 0.052096482 | Non significant |
|               | S28  | 0.0438 | 7.82143E-05 | 0.042856272 | significant     |
|               | S29  | 0.0655 | 0.000116964 | 0.063404541 | Non significant |
|               | S30  | 0.0489 | 8.73214E-05 | 0.047725681 | significant     |
|               |      |        |             |             |                 |
| RPNF-BPH-12 h | S3a  | 0.0546 | 0.0000975   | 0.053138703 | Non significant |
|               | S4   | 0.0478 | 8.53571E-05 | 0.046677512 | significant     |
|               | S4a  | 0.0645 | 0.000115179 | 0.062467368 | Non significant |

|              |      |        |             |             |                 |
|--------------|------|--------|-------------|-------------|-----------------|
|              | S5   | 0.0342 | 6.10714E-05 | 0.0336228   | significant     |
|              | S5a  | 0.0556 | 9.92857E-05 | 0.054085184 | Non significant |
|              | S6   | 0.0416 | 7.42857E-05 | 0.040748077 | significant     |
|              | S6a  | 0.0652 | 0.000116429 | 0.063123488 | Non significant |
|              | S7   | 0.0581 | 0.00010375  | 0.056447257 | Non significant |
|              | S7a  | 0.0515 | 9.19643E-05 | 0.050198599 | Non significant |
|              | S9   | 0.0491 | 8.76786E-05 | 0.047916133 | significant     |
|              | S9-2 | 0.0425 | 7.58929E-05 | 0.04161108  | significant     |
|              | S10  | 0.0652 | 0.000116429 | 0.063123488 | Non significant |
|              | S10a | 0.0451 | 8.05357E-05 | 0.044099849 | significant     |
|              | S13  | 0.0568 | 0.000101429 | 0.055219715 | Non significant |
|              | S13a | 0.0428 | 7.64286E-05 | 0.041898576 | significant     |
|              | S15  | 0.0518 | 0.0000925   | 0.050483523 | Non significant |
|              | S15a | 0.0565 | 0.000100893 | 0.054936209 | Non significant |
|              | S17  | 0.0421 | 7.51786E-05 | 0.041227619 | significant     |
|              | S18  | 0.0514 | 9.17857E-05 | 0.050103606 | Non significant |
|              | S18a | 0.0589 | 0.000105179 | 0.057201876 | Non significant |
|              | S18b | 0.0419 | 7.48214E-05 | 0.041035831 | significant     |
|              | S19  | 0.0751 | 0.000134107 | 0.072353955 | Non significant |
|              | S20  | 0.0535 | 9.55357E-05 | 0.052096482 | Non significant |
|              | S21  | 0.0741 | 0.000132321 | 0.071425721 | Non significant |
|              | S23  | 0.0455 | 0.00008125  | 0.044482164 | significant     |
|              | S23a | 0.0655 | 0.000116964 | 0.063404541 | Non significant |
|              | S24  | 0.0651 | 0.00011625  | 0.063029784 | Non significant |
|              | S25  | 0.0481 | 8.58929E-05 | 0.04696349  | significant     |
|              | S25a | 0.0856 | 0.000152857 | 0.082044664 | Non significant |
|              | S26  | 0.0681 | 0.000121607 | 0.065836816 | Non significant |
|              | S27  | 0.0432 | 7.71429E-05 | 0.042281769 | significant     |
|              | S27a | 0.0316 | 5.64286E-05 | 0.031106802 | significant     |
|              | S28  | 0.0551 | 9.83929E-05 | 0.053612061 | Non significant |
|              | S29  | 0.0623 | 0.00011125  | 0.060402292 | Non significant |
|              | S30  | 0.0547 | 9.76786E-05 | 0.053233393 | Non significant |
|              |      |        |             |             |                 |
| RPNF-GM-24 h | S3a  | 0.0415 | 7.41071E-05 | 0.04065214  | significant     |
|              | S4   | 0.0631 | 0.000112679 | 0.061153754 | Non significant |
|              | S4a  | 0.0471 | 8.41071E-05 | 0.046009896 | significant     |
|              | S5   | 0.0685 | 0.000122321 | 0.066210452 | Non significant |
|              | S5a  | 0.0451 | 8.05357E-05 | 0.044099849 | significant     |
|              | S6   | 0.0655 | 0.000116964 | 0.063404541 | Non significant |
|              | S6a  | 0.0419 | 7.48214E-05 | 0.041035831 | significant     |
|              | S7   | 0.0421 | 7.51786E-05 | 0.041227619 | significant     |
|              | S7a  | 0.0537 | 9.58929E-05 | 0.052286061 | Non significant |
|              | S9   | 0.0719 | 0.000128393 | 0.069380342 | Non significant |
|              | S9-2 | 0.0611 | 0.000109107 | 0.059273974 | Non significant |

|               |      |        |             |             |                 |
|---------------|------|--------|-------------|-------------|-----------------|
|               | S10  | 0.0517 | 9.23214E-05 | 0.050388558 | Non significant |
|               | S10a | 0.0546 | 0.0000975   | 0.053138703 | Non significant |
|               | S13  | 0.0618 | 0.000110357 | 0.059932324 | Non significant |
|               | S13a | 0.0563 | 0.000100536 | 0.054747159 | Non significant |
|               | S15  | 0.0594 | 0.000106071 | 0.057673207 | Non significant |
|               | S15a | 0.0543 | 9.69643E-05 | 0.052854574 | Non significant |
|               | S17  | 0.0506 | 9.03571E-05 | 0.049343315 | significant     |
|               | S18  | 0.0386 | 6.89286E-05 | 0.037865794 | significant     |
|               | S18a | 0.0587 | 0.000104821 | 0.057013278 | Non significant |
|               | S18b | 0.0514 | 9.17857E-05 | 0.050103606 | Non significant |
|               | S19  | 0.0638 | 0.000113929 | 0.061810791 | Non significant |
|               | S20  | 0.0718 | 0.000128214 | 0.069287264 | Non significant |
|               | S21  | 0.0631 | 0.000112679 | 0.061153754 | Non significant |
|               | S23  | 0.0565 | 0.000100893 | 0.054936209 | Non significant |
|               | S23a | 0.0428 | 7.64286E-05 | 0.041898576 | significant     |
|               | S24  | 0.0535 | 9.55357E-05 | 0.052096482 | Non significant |
|               | S25  | 0.0618 | 0.000110357 | 0.059932324 | Non significant |
|               | S25a | 0.0536 | 9.57143E-05 | 0.052191276 | Non significant |
|               | S26  | 0.0551 | 9.83929E-05 | 0.053612061 | Non significant |
|               | S27  | 0.0428 | 7.64286E-05 | 0.041898576 | significant     |
|               | S27a | 0.0645 | 0.000115179 | 0.062467368 | Non significant |
|               | S28  | 0.0551 | 9.83929E-05 | 0.053612061 | Non significant |
|               | S29  | 0.0441 | 0.00007875  | 0.043143395 | significant     |
|               | S30  | 0.0528 | 9.42857E-05 | 0.051432654 | Non significant |
|               |      |        |             |             |                 |
| RPNF-GM-120 h | S3a  | 0.0632 | 0.000112857 | 0.061247644 | Non significant |
|               | S4   | 0.0418 | 7.46429E-05 | 0.040939923 | significant     |
|               | S4a  | 0.0634 | 0.000113214 | 0.061435397 | Non significant |
|               | S5   | 0.0471 | 8.41071E-05 | 0.046009896 | significant     |
|               | S5a  | 0.0518 | 0.0000925   | 0.050483523 | significant     |
|               | S6   | 0.0682 | 0.000121786 | 0.065930239 | Non significant |
|               | S6a  | 0.0453 | 8.08929E-05 | 0.044291026 | significant     |
|               | S7   | 0.0631 | 0.000112679 | 0.061153754 | Non significant |
|               | S7a  | 0.0423 | 7.55357E-05 | 0.041419369 | significant     |
|               | S9   | 0.0721 | 0.00012875  | 0.069566472 | Non significant |
|               | S9-2 | 0.0471 | 8.41071E-05 | 0.046009896 | significant     |
|               | S10  | 0.0541 | 9.66071E-05 | 0.052665108 | Non significant |
|               | S10a | 0.0418 | 7.46429E-05 | 0.040939923 | significant     |
|               | S13  | 0.0315 | 0.00005625  | 0.031009902 | significant     |
|               | S13a | 0.0402 | 7.17857E-05 | 0.039404086 | significant     |
|               | S15  | 0.0537 | 9.58929E-05 | 0.052286061 | Non significant |
|               | S15a | 0.0471 | 8.41071E-05 | 0.046009896 | significant     |
|               | S17  | 0.0358 | 6.39286E-05 | 0.035167863 | significant     |

|      |        |             |             |                 |
|------|--------|-------------|-------------|-----------------|
| S18  | 0.0571 | 0.000101964 | 0.055503135 | significant     |
| S18a | 0.0452 | 8.07143E-05 | 0.044195442 | significant     |
| S18b | 0.0514 | 9.17857E-05 | 0.050103606 | Non significant |
| S19  | 0.0435 | 7.76786E-05 | 0.042569064 | significant     |
| S20  | 0.0451 | 8.05357E-05 | 0.044099849 | significant     |
| S21  | 0.0489 | 8.73214E-05 | 0.047725681 | significant     |
| S23  | 0.0441 | 0.00007875  | 0.043143395 | significant     |
| S23a | 0.0615 | 0.000109821 | 0.05965023  | Non significant |
| S24  | 0.0319 | 5.69643E-05 | 0.031397443 | significant     |
| S25  | 0.0458 | 8.17857E-05 | 0.044768799 | significant     |
| S25a | 0.0612 | 0.000109286 | 0.059368052 | Non significant |
| S26  | 0.0464 | 8.28571E-05 | 0.045341813 | significant     |
| S27  | 0.0423 | 7.55357E-05 | 0.041419369 | significant     |
| S27a | 0.0579 | 0.000103393 | 0.056258508 | Non significant |
| S28  | 0.0518 | 0.0000925   | 0.050483523 | significant     |
| S29  | 0.0482 | 8.60714E-05 | 0.047058797 | significant     |
| S30  | 0.0491 | 8.76786E-05 | 0.047916133 | significant     |
